# Supplementary material
Source: publisher site journal article supplement (https://www.dovepress.com/article/305223)
Supplement: Supplementary file 1 [file get_supplementary_file.php]

## **Online Data Supplement**

### **Predicting Survival for Patients with Malignant Pleural Effusion: Development of the CONCH Prognostic Model**

Xin Zhang, Feng-Shuang Yi\*, Huan-Zhong Shi\*

Department of Respiratory and Critical Care Medicine, Beijing Institute of Respiratory  
Medicine and Beijing Chao-Yang Hospital, Capital Medical University, Beijing 100020,  
China

\*Corresponding author: Huan-Zhong Shi; Feng-Shuang Yi

Department of Respiratory and Critical Care Medicine, Beijing Institute of  
Respiratory Medicine and Beijing Chao-Yang Hospital, Capital Medical University, 8  
Gongti Nanlu, Chao-Yang District, Beijing 100020, China

Tel/Fax: (86) 10 85231890

E-mail: [shihuanzhong@ccmu.edu.cn](mailto:shihuanzhong@ccmu.edu.cn) ; [yifengshuang@ccmu.edu.cn](mailto:yifengshuang@ccmu.edu.cn)

Supplementary Figure 1

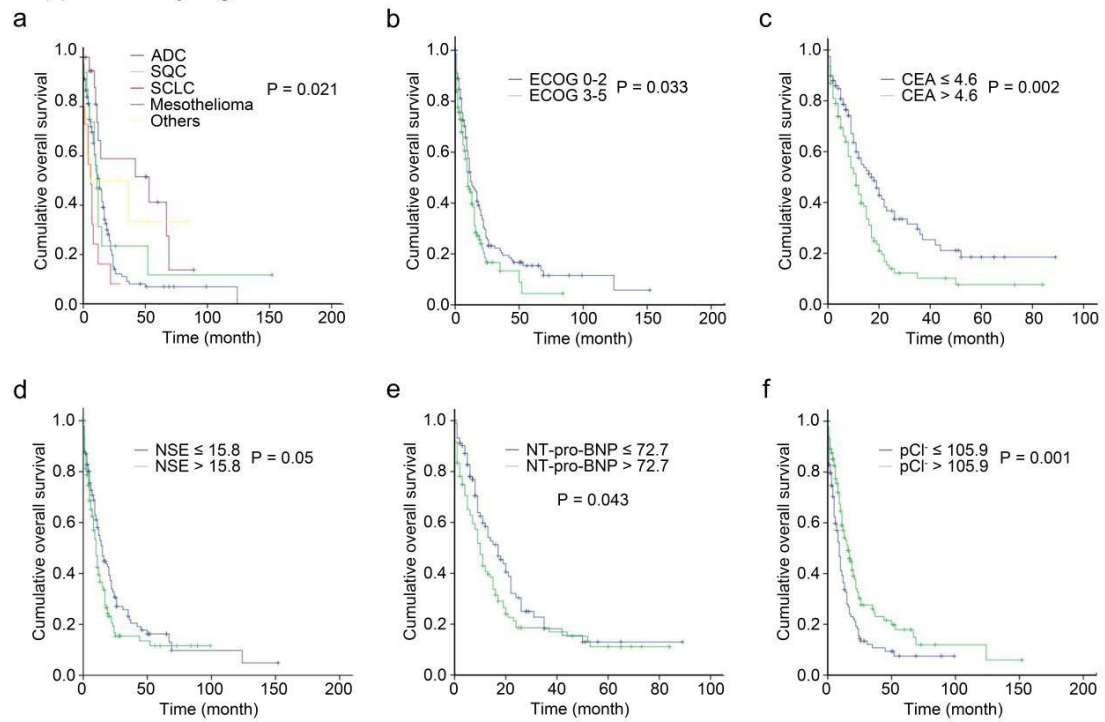

**Supplementary Figure 1.** Survival curves estimated by the Kaplan–Meier survivor function for histologic types, ECOG PS, and CEA, NSE, NT-pro-BNP, and pleural effusion chloride levels. P values are obtained by univariate Cox logistic regression.

## Supplementary Figure 2

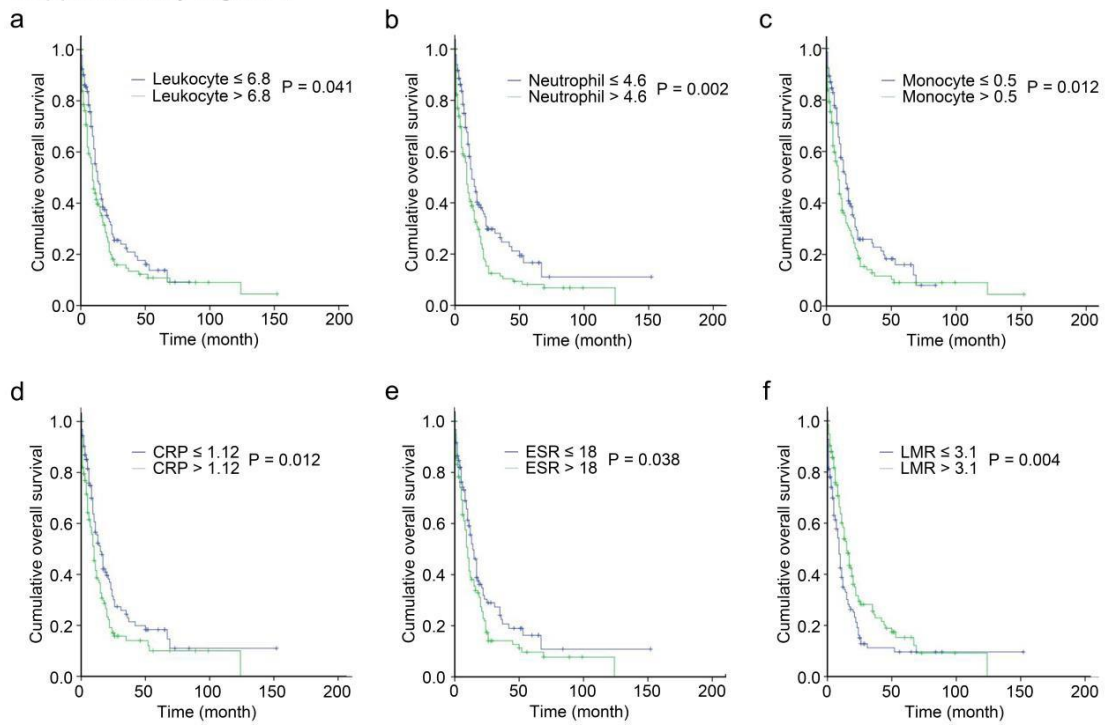

**Supplementary Figure 2.** Survival curves estimated by the Kaplan–Meier survivor function for leukocyte, neutrophil, and monocyte counts, CRP level, and ESR and LMR. P values are obtained by univariate Cox logistic regression.

### Supplementary Figure 3

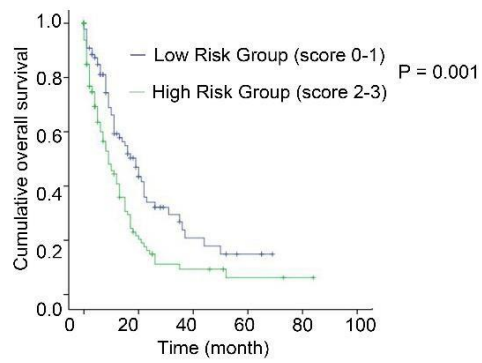

**Supplementary Figure 3.** Survival curves estimated by Kaplan–Meier survivor function of 2 groups stratified by CEA level, monocyte count and pleural effusion Cl level.

**Supplementary Table 1.** Prognostic scoring method and multivariate analysis of prognostic factors

| <b>Predictors</b>                             | <b>MVP</b> |               |                | <b>Points</b> |
|-----------------------------------------------|------------|---------------|----------------|---------------|
|                                               | <b>HR</b>  | <b>95% CI</b> | <b>P value</b> |               |
| <b>CEA ng/mL</b>                              |            |               |                |               |
| ≤ 4.5                                         | 1          | -             | -              | 0             |
| > 4.5                                         | 1.919      | 1.310-2.812   | 0.001          | 1             |
| <b>Monocyte ×10<sup>9</sup>/L</b>             |            |               |                |               |
| ≤ 0.5                                         | 1          | -             | -              | 0             |
| > 0.5                                         | 1.539      | 1.057-2.242   | 0.024*         | 1             |
| <b>Pleural effusion Cl<sup>-</sup> mmol/L</b> |            |               |                |               |
| ≤ 105.9                                       | 1          | -             | -              | 1             |
| > 105.9                                       | 0.629      | 0.436-0.909   | 0.013*         | 0             |

\*p<0.05

**Supplementary Table 2.** Median survival of patients according to—CEA, monocyte count and pleural effusion CI—based strategy.

| Variable                       | n   | Median survival<br>(IQR) months | HR    | 95% CI      | P value |
|--------------------------------|-----|---------------------------------|-------|-------------|---------|
| Low Risk Group<br>(score 0-1)  | 92  | 19 (6-21)                       | 1     | -           | -       |
| High Risk Group<br>(score 2-3) | 112 | 9 (2-13)                        | 1.791 | 1.264-2.538 | 0.001   |
